# Supplementary material for: Oxidative stress induces stem cell proliferation via TRPA1/RyR-mediated Ca2+ signaling in the Drosophila midgut
Source: eLife. 2017 May 31;6:e22441. doi: 10.7554/eLife.22441 (PMC5451214; doi:10.7554/eLife.22441)
Supplement: Figure 1—source data 1. — DOI: http://dx.doi.org/10.7554/eLife.22441.003 [file elife-22441-fig1-data1.xls]

## Sheet: Figure 1--source data 1
Figure 1G
	Luc RNAi				trpA1 RNAi				RyR RNAi
	Normal	Paraquat 2d	Bleomycin 2d	SERCA RNAi	Normal	Paraquat 2d	Bleomycin 2d	SERCA RNAi	Normal	Paraquat 2d	Bleomycin 2d	SERCA RNAi
	0	91	85	101	0	0	4	73	2	2	0	15
	3	60	58	116	0	0	1	64	0	1	0	30
	1	55	94	81	0	0	0	52	0	3	2	37
	1	35	54	84	0	4	2	74	0	0	1	10
	6	58	73	98	0	0	3	88	2	1	0	30
	1	81	58	113	0	0	0	89	4	0	0	19
	1	63	126		0	0	2					39
	0	49	73		1	3	1
			51				0
			76				0
			83				0
			66				0
			56
			46
			65
Average (Ave)	1.625	61.5	70.9333	98.8333	0.125	0.875	1.08333	73.3333	1.33333	1.16667	0.5	25.7143
Standard Error of Mean (SEM)	0.705527	6.22208	5.28472	5.88454	0.125	0.580563	0.39807	5.78312	0.666667	0.477261	0.341565	4.21852
Figure 1H
	EGT UAS-Cas9	Ctrl	sgtrpA1	sgRyR
		83	38	26
		27	31	37
		44	46	50
		54	31	50
		55	42	30
		53	40	55
		115	25	35
		47
	AVE	59.75	36.1429	40.4286
	SEM	9.61537	2.78968	4.23622
	ttest p value		0.0455094	0.0971448
Figure 1I
Normalized length	Normal food	EGT Ctrl	EGT TrpA1 RNAi	Paraquat 2D	EGT Ctrl	EGT TrpA1 RNAi	Bleomycin 2D	EGT Ctrl	EGT TrpA1 RNAi
		0.944656	0.902672		0.944656	0.860687		1.07061	0.860687
		1.02863	0.839695		0.986641	0.650763		1.0916	0.71374
		0.944656	0.839695		0.923664	0.839695		1.1126	0.776718
		1.02863	0.79771		0.839695	0.755725		0.944656	0.734733
		1.07061	0.944656		1.02863	0.902672		0.986641	0.629771
		1.00763	0.860687		0.986641	0.692748		1.0916	0.860687
		1.07061	0.881679		0.986641	0.671756
		0.923664	1.00763		1.15458	0.965649
		0.881679	0.944656		1.0916	0.818702
		1.07061	0.881679		1.02863	0.881679
		1.02863	0.881679		1.07061	0.79771
	Ave	1	0.889313		1.00382	0.803435		1.04962	0.762723
	S.E.M	0.0198693	0.0177389		0.0259149	0.0304985		0.0276377	0.0366282
Figure 1--figure supplement 1E
	EGT> 3d	Number (/1 side posterior midgut)	Imaged Gut Area	Luc RNAi density	Normalized Luc RNAi density		Number	Imaged Gut Area	trpA1 RNAi density	Normalized trpA1 RNAi density		Number	Imaged Gut Area	RyR RNAi density	Normalized RyR RNAi density
		452	27.43	16.4783	0.145826		680	39.96	17.017	0.150593		554	33.17	16.7018	0.147804
		562	41.51	13.5389	0.119813		598	35.61	16.793	0.148611		427	24.87	17.1693	0.151941
		527	32.26	16.336	0.144567		586	32.08	18.2668	0.161653		591	49.79	11.8699	0.105043
		666	50.51	13.1855	0.116686		485	34.34	14.1235	0.124986		550	30.17	18.23	0.161328
		554	32.84	16.8697	0.149289		657	47.77	13.7534	0.121712		670	34.79	19.2584	0.170428
		450	31.35	14.3541	0.127027		568	34.04	16.6863	0.147666		474	32.95	14.3854	0.127305
		Ave		15.1271	0.133868				16.1067	0.142537				16.2691	0.143975
		SEM		0.663665	0.00587314				0.725098	0.00641679				1.10575	0.00978538
	EGT> 5d	566	47.16	12.0017	1.09194		298	28.43	10.4819	0.953668		452	40.87	11.0595	1.00622
		431	40.56	10.6262	0.966801		275	27.3	10.0733	0.91649		348	34.02	10.2293	0.930685
		342	31.71	10.7852	0.981268		202	22.37	9.02995	0.821568		408	34.62	11.7851	1.07224
		585	53.87	10.8595	0.988022		333	29.26	11.3807	1.03545		322	26.25	12.2667	1.11605
		294	28.89	10.1765	0.925886		414	35.59	11.6325	1.05835		324	38.08	8.5084	0.774116
		638	55.49	11.4976	1.04608		367	32.39	11.3307	1.03089		302	32.83	9.1989	0.836939
		Ave		10.9911	1				10.6548	0.969403				10.508	0.956041
		SEM		0.266719	0.0242667				0.406113	0.0369492				0.600494	0.0546345
	EGT> 7d	428	39.28	10.8961	0.95831		323	32.57	9.9171	0.872205		289	30.82	9.37703	0.824705
		336	28.09	11.9616	1.05201		298	33.89	8.79315	0.773354		280	32.77	8.5444	0.751476
		360	30.76	11.7035	1.02932		336	30.98	10.8457	0.953875		275	31.6	8.70253	0.765384
		313	27.35	11.4442	1.00652		373	40.33	9.2487	0.813419		355	40.38	8.79148	0.773207
		479	43.99	10.8888	0.957668		278	33.52	8.29356	0.729414		383	39.12	9.79039	0.86106
		491	42.02	11.6849	1.02768		338	32.06	10.5427	0.927228		302	43.2	6.99074	0.614832
		370	33.6	11.0119	0.968492							296	39.56	7.48231	0.658065
				11.3702	1				9.60682	0.844916				8.52555	0.749819
				0.165482	0.0145541				0.409146	0.0359842				0.373887	0.0328831
Figure 1--figure supplement 3A
	EGT>	rpr off	Bleo3d	rpr on (for 4d)	rpr on + Bleo3d	post-rpr 9d (4d 29 degree plus 9d 18 degree)	post-rpr 9d+ Bleo3d
	relative length normalized to Average of (rpr off) group
		1.00658	1.13983	1.17845	0.618284	0.913944	0.644615
		0.981214	1.00443	0.955427	0.835491	0.785431	0.728904
		0.930983	0.954833	0.964922	0.649805	0.902745	0.553127
		0.970717	1.09035	1.01613	0.715842	0.821892	0.603836
		0.931883	0.900371	0.909837	0.637108	0.93774	0.632378
		0.985234	0.960006	0.724912	0.68021	0.988836	0.806516
		1.11217	0.969109	0.836214	0.627823	1.04652	0.48638
		1.03593	1.04906	1.01506		0.985582	0.668679
		1.04529	1.15743			0.87331	0.683017
			1.06824			0.700223	0.664803
						0.8664	0.630281
	Ave	1	1.02937	0.95012	0.680652	0.892966	0.645685
	SEM	0.0192927	0.0269732	0.0474858	0.0287609	0.0299616	0.0254401
Figure 1--figure supplement 3B
	EGT>
		rpr off + Norm3D	rpr off + Bleo3D	EGT rpr on 4D plus Norm3D	EGT rpr on 4D plus Bleo3D	rpr 4D on 6D off +Norm3D	rpr 4D on 6D off +Bleo3D	post-rpr 9D +Norm food	post-rpr 9D rest+Bleo 3D	post-rpr 21D + Norm food	post-rpr 21D + Bleo 3D
		14	56	2	7	1	16	0	1	8	6
		4	88	2	2	3	3	0	9	3	4
		7	124	7	4	1	7	12	7	1	1
		59	93	7	15	5	7	0	0	0	6
		7	95	2	7	2	6	0	0	8	18
		6	105	1	11	6	4	2	16	7	36
		4	97	6	3	4	4	4	2	24	25
		6	81	1	1	3	2	0	7	4	29
		6	121			8	4	5	8	0	4
			89			3	3	2	1	0	5
								3	0	6	6
								1	13	7	3
								1	7		4
								8	0		3
								1	0		10
								0	0
	Ave	12.5556	94.9	3.5	6.25	3.6	5.6	2.4375	4.4375	5.66667	10.6667
	S.E.M	5.8881	6.17063	0.944911	1.69821	0.702377	1.27541	0.851316	1.30374	1.90427	2.82787
