# Supplementary material for: Oxidative stress induces stem cell proliferation via TRPA1/RyR-mediated Ca2+ signaling in the Drosophila midgut
Source: eLife. 2017 May 31;6:e22441. doi: 10.7554/eLife.22441 (PMC5451214; doi:10.7554/eLife.22441)
Supplement: Figure 2—source data 1. — DOI: http://dx.doi.org/10.7554/eLife.22441.008 [file elife-22441-fig2-data1.xls]

## Sheet: Figure 2--source data 1
Figure 2J
MARCM 10d	Luc RNAi	TrpA1 RNAi	Ctrl	RyR k04913
	20	4	8	2
	9	10	5	1
	12	3	6	1
	9	2	8	1
	5	1	4	1
	6	4	2	2
	16	4	1	6
	14	11	10	2
	12	5	14	1
	7	4	10	1
	9	4	12	2
	8	4	6	1
	28	4	6	1
	10	6	4	5
	7	5	22	2
	13	2	8	1
	10	2	4	1
	9	3	1	1
	10	9	6	2
	8	6	5	1
	29	5	3	1
	6	4	8	2
	8	3	11	3
	19	5	7	6
	7	1	9	6
	19	2	3	1
	10	2	3	4
	5	1	7	1
	7	1	8	8
	18	6	9	2
	27	14	11	2
	6	9	5	1
	16	6	10	1
	13	3	3	1
	14	1	15	3
average	12.1714	4.45714	7.25714	2.2
SEM	1.09044	0.515871	0.731457	0.311677
ttest p value		5.98459e-08		8.36312e-08
Figure 2K
	EGT Dl-lacZ 5d	Luc RNAi	trpA1 RNAi	RyR RNAi
Dl+ cell density normalized to the average of Luc RNAi group		1.10126	0.276784	0.0980935
		1.12843	0.202264	0.156463
		0.774496	0.140202	0.0761056
		1.1235	0.369953	0.0980309
		1.02634	0.0436369	0.146865
		0.766843	0.39872	0.109529
		1.12106	0.456788
		0.958062	0.261385
	AVE	1	0.268717	0.114181
	SEM	0.0541698	0.0489592	0.012711
Figure 2L	5D RNAi EsgGal4 Su(H)GbeGFP>	Luc RNAi				trpA1 RNAi				RyR RNAi
		number	area	density	relative density	number	area	density	relative density	number	area	density	relative density
	Su(H)Gbe+ cell density	94	31.57	2.97751	0.883329	125	33.97	3.67972	1.09165	137	31.3	4.377	1.29851
		78	29.3	2.66212	0.789762	75	36.83	2.03638	0.604127	149	37.04	4.02268	1.1934
		73	33.23	2.19681	0.651721	120	36.41	3.2958	0.977754	121	32.93	3.67446	1.09009
		121	30.81	3.9273	1.1651	74	29.62	2.49831	0.741166	131	28.06	4.66857	1.38501
		110	30.18	3.6448	1.08129	105	34.62	3.03293	0.899769	149	31.89	4.67231	1.38612
		131	27.2	4.81618	1.4288					65	24.08	2.69934	0.800803
	Ave				1				0.862893				1.19232
	SEM				0.115014				0.0862148				0.0912325
Figure 2M
	EGT> 3d	Luc RNAi	trpA1 RNAi	RyR RNAi	EGT> 5d	Luc RNAi	trpA1 RNAi	RyR RNAi	EGT> 7d	Luc RNAi	trpA1 RNAi	RyR RNAi
	pros+ relative density	1.10574	1.31343	0.78486		0.979063	1.09888	0.955505		0.990708	0.938781	0.668906
		0.804735	1.11791	0.848359		1.05909	0.959248	0.769767		0.981303	1.07309	0.933051
		0.614379	1.02505	0.93245		0.970727	1.00635	0.968756		1.11451	1.00192	0.674386
		1.12246	0.994669	0.979155		0.933868	0.902843	1.04137		0.906222	0.873018	0.631007
		1.35269	1.08984	0.624067		1.20861	0.96817	0.77215		1.21111	0.753235	0.858573
				1.10196		0.848648	0.9929	0.965599		0.865469	0.859788	0.884725
										0.930684		0.480137
	Ave	1	1.10818	0.878475		1	0.988065	0.912191		1	0.916638	0.732969
	SEM	0.129884	0.0558365	0.0676732		0.0501942	0.0265373	0.0463725		0.0462424	0.0462151	0.0618552
