# Supplementary material for: Oxidative stress induces stem cell proliferation via TRPA1/RyR-mediated Ca2+ signaling in the Drosophila midgut
Source: eLife. 2017 May 31;6:e22441. doi: 10.7554/eLife.22441 (PMC5451214; doi:10.7554/eLife.22441)
Supplement: Figure 3—source data 1. — DOI: http://dx.doi.org/10.7554/eLife.22441.011 [file elife-22441-fig3-data1.xls]

## Sheet: Figure 3--source data 1
Figure 3--figure supplement 2B
DlGal4ts	Luc RNAi	trpA1 RNAi	Su(H)Gal4ts	Luc RNAi	trpA1 RNAi	24BGal4ts	Luc RNAi	trpA1 RNAi	tubGal4ts	Luc RNAi	trpA1 RNAi
pH3+ cell/ midgut	47	8		115	91		100	55		79	13
	45	8		126	71		55	45		74	10
	43	3		122	80		37	61		98	12
	54	1		145	98		62	59		94	19
	72	6		118	67		63	56		76	15
	28	2		95	120		50	64		96	31
	60	4		89	108		66	53		106	4
	56	6		93	102		50	40		84
	66	5		95	91		63	62
	45	9		93	125
AVE	51.6	5.2		109.1	95.3		60.6667	55		88.375	14.8571
SEM	4.02547	0.85375		5.93942	6.11746		5.78312	2.66667		4.14012	3.20289
ttest p value		6.21467e-07			0.122959			0.392185			4.49404e-09
