# Supplementary material for: Oxidative stress induces stem cell proliferation via TRPA1/RyR-mediated Ca2+ signaling in the Drosophila midgut
Source: eLife. 2017 May 31;6:e22441. doi: 10.7554/eLife.22441 (PMC5451214; doi:10.7554/eLife.22441)
Supplement: Figure 4—source data 1. — DOI: http://dx.doi.org/10.7554/eLife.22441.015 [file elife-22441-fig4-data1.xls]

## Sheet: Figure 4--source data 1
Figure 4F
	EGT TrpA1 RNAi normal	EGT TrpA1 RNAi para2d	TrpA1 RNAi + TrpA1 C	TrpA1 RNAi + TrpA1 C Para2d	TrpA1 RNAi + TrpA1 D	TrpA1 RNAi + TrpA1 D Para2d
	1	0	0	1	2	11
	0	1	0	1	0	3
	0	4	7	19	7	1
	0	0	0	2	6	3
	0	0	0	0	0	15
		0	6	1	0	19
		1	1	0	5	20
		1	0	0		2
			5	0		15
			0	0		4
			0
AVE	0.2	0.875	1.72727	2.4	2.85714	9.3
SEM	0.2	0.47949	0.843056	1.85712	1.1635	2.37136
ttest p value		0.225597		0.746931		0.0301437
ttest p value				0.4447		0.00614402
Figure 4G		EGT	CnCC RNAi	CnCC RNAi + TrpA1 RNAi
			18	0
			73	3
			64	1
			6	5
			38	10
			12	14
			60	1
			27	3
				4
				1
			37.25	4.2
			9.06475	1.42049
Figure 4H
	EGT>		Ctrl	TRPA1-C	TRPA1-D	TRPA1-A
			6	11	1	20
			7	4	47	18
			10	6	23	26
			11	7	44	50
			5	23	36	36
			8	14	25	22
			1	23	5	29
			12	5	0	12
			10	12	3	10
			2	22	29	17
						.
		AVE	7.2	12.7	21.3	24
		SEM	1.18134	2.39467	5.70974	3.7918
