# Supplementary material for: Oxidative stress induces stem cell proliferation via TRPA1/RyR-mediated Ca2+ signaling in the Drosophila midgut
Source: eLife. 2017 May 31;6:e22441. doi: 10.7554/eLife.22441 (PMC5451214; doi:10.7554/eLife.22441)
Supplement: Figure 5—source data 1. — DOI: http://dx.doi.org/10.7554/eLife.22441.018 [file elife-22441-fig5-data1.xls]

## Sheet: Figure 5--source data 1
Figure 5D
esg-Gal4>GCaMP6s	Ctrl	Ctrl paraquat 10min		trpA1 RNAi	trpA1 RNAi paraquat 10min		RyR RNAi	RyR RNAi paraquat 10min
	174	324		52	38		55	60
	247	547		26	21		76	72
	275	412		19	20		78	134
	258	331		53	73		74	67
	148	248		57	26		113	148
	169	326		38	22
	256	299		30	31
				91	79
AVE	218.143	355.286		45.75	38.75		79.2	96.2
SEM	19.7429	36.8638		8.10588	8.41289		9.39894	18.5213
		0.00473901			0.342624			0.237822
Figure 5--supplement figure 1D&E
EGT>GCamP6s	Ctrl	total GCamP6s+ cell number	imaged gut area	density	relative density		trpA1 RNAi	total GCamP6s+ cell number	imaged gut area	density	relative density		RyR RNAi	total GCamP6s+ cell number	imaged gut area	density	relative density
		436	31.27	13.9431	1.34138			302	31.02	9.73565	0.936609			475	42.25	11.2426	1.08158
		312	39.78	7.84314	0.754541			389	38.94	9.98973	0.961052			616	49.39	12.4722	1.19987
		681	58.97	11.5482	1.11099			442	37.06	11.9266	1.14739			509	36.41	13.9797	1.3449
		486	40.22	12.0835	1.16248			255	33.61	7.58703	0.729902			445	37.01	12.0238	1.15674
		754	78.7	9.58069	0.9217			473	43.45	10.8861	1.04728			390	37.73	10.3366	0.994422
		927	79.68	11.634	1.11924			446	44.18	10.0951	0.971186			276	28.99	9.52052	0.915913
		457	55.37	8.25357	0.794026			464	52.58	8.82465	0.848966			368	37.38	9.84484	0.947113
		378	36.74	10.2885	0.989796			447	48.75	9.16923	0.882117			439	42.25	10.3905	0.999611
		520	54.61	9.52207	0.916061			425	35.41	12.0023	1.15467			406	38.07	10.6646	1.02597
		298	32.22	9.24891	0.889782									407	37.34	10.8998	1.04861
														382	37.47	10.1948	0.980783
	Average	524.9		10.3946	1			404.778		10.024	0.964352			428.455		11.0518	1.06323
	SEM	64.2027		0.597708	0.0575019			25.4634		0.478334	0.0460177			26.2351		0.39576	0.0380737
Figure 5--supplement figure 2F
esgGal4ts>TRIC
Normal	Ctrl	Ctrl	Ctrl	trpA1 RNAi	trpA1 RNAi	trpA1 RNAi	RyR RNAi	RyR RNAi	RyR RNAi
	GFP	RFP	Ratio	GFP	RFP	Ratio	GFP	RFP	Ratio
	11	45	0.244444	8	34	0.235294	20	82	0.243902
	8	33	0.242424	7	30	0.233333	8	39	0.205128
	9	49	0.183673	3	23	0.130435	6	35	0.171429
	32	113	0.283186	5	22	0.227273
	14	64	0.21875	11	48	0.229167
	9	45	0.2
Average			0.228746			0.2111			0.20682
SEM			0.0145545			0.020217			0.0209385
Paraquat	Ctrl	Ctrl	Ctrl	trpA1 RNAi	trpA1 RNAi	trpA1 RNAi	RyR RNAi	RyR RNAi	RyR RNAi
	GFP	RFP	Ratio	GFP	RFP	Ratio	GFP	RFP	Ratio
	45	63	0.714286	24	104	0.230769	10	61	0.163934
	21	46	0.456522	7	23	0.304348	10	38	0.263158
	31	53	0.584906	4	17	0.235294	13	53	0.245283
	42	65	0.646154	16	47	0.340426
	43	64	0.671875	12	34	0.352941
	27	42	0.642857
	43	62	0.693548
	24	40	0.6
Average			0.626268			0.292756			0.224125
SEM			0.028735			0.0256644			0.0305345
