# Supplementary material for: Oxidative stress induces stem cell proliferation via TRPA1/RyR-mediated Ca2+ signaling in the Drosophila midgut
Source: eLife. 2017 May 31;6:e22441. doi: 10.7554/eLife.22441 (PMC5451214; doi:10.7554/eLife.22441)
Supplement: Figure 6—source data 1. — DOI: http://dx.doi.org/10.7554/eLife.22441.028 [file elife-22441-fig6-data1.xls]

## Sheet: Sheet1
Figure 6--figure supplement 2H
EGT>TrpA1 RNAi+	GFP	Src42Aᶜᵃ	Src64B
	0	102	244
	0	87	223
	0	96	189
	0	76	286
	0	122	213
	0	81	277
	0		270
	0
Ave	0	94	243.143
SEM	0	6.81665	13.7589
Figure 6--figure supplement 2I
EGT SERCA RNAi (BL25928) +		Luc RNAi	Src42A RNAi	Src64B RNAi
		47	45	16
		65	21	17
		63	44	24
		44	47	27
		44	122	11
			57	33
				47
	Ave	52.6	56	25
	SEM	4.69681	14.057	4.61364
				0.00205808
