# Supplementary material for: Oxidative stress induces stem cell proliferation via TRPA1/RyR-mediated Ca2+ signaling in the Drosophila midgut
Source: eLife. 2017 May 31;6:e22441. doi: 10.7554/eLife.22441 (PMC5451214; doi:10.7554/eLife.22441)
Supplement: Figure 7—source data 1. — DOI: http://dx.doi.org/10.7554/eLife.22441.032 [file elife-22441-fig7-data1.xls]

## Sheet: Figure 7--source data 1
Figure 7F
EGT>	GFP	Ras1ᴬ	Rafᵍᵒᶠ	spi	pvf1	CanA1ᶜᵃ	CRTC	CrebBᵃᶜᵗ
	3	128	52	72	0	104	32	21
	2	147	48	58	1	174	18	83
	0	165	42	83	6	148	37	17
	1	80	23	99	1	154	67	62
	2	169	48	74	14	178	37	10
	0	181	25	50	1	61	28	7
	2	169			10	102	30	11
	5				11	117	21	20
Ave	1.875	148.429	39.6667	72.6667	5.5	129.75	33.75	28.875
SEM	0.580563	13.169	5.12944	7.14454	1.95485	14.3487	5.3243	9.87681
ttest compared to trpA1 RNAi + group	0.658697	0.0696775	0.537425	0.2914	0.0344381	3.796e-05	0.00216133	0.0262265
EGT>trpA1 RNAi +	GFP	Ras1ᴬ	Rafᵍᵒᶠ	spi	pvf1	CanA1ᶜᵃ	CRTC	CrebBᵃᶜᵗ
	1	66	42	97	0	7	13	2
	2	139	32	69	0	15	5	3
	0	115	36	48	0	9	2	1
	8	112	28	29	0	3	7	2
	0	87	79	96	0	7	6	0
	2	150	30	37	0	4	18	0
	4		58	68	1	40	9	0
			27	85	2	2	7
			55	48			19
			57	30
	2.42857	111.5	44.4	60.7	0.375	10.875	9.55556	1.14286
	1.06586	12.8082	5.43895	8.23819	0.263052	4.40551	1.95868	0.459221
Figure 7--figure supplement 1F
EGT SERCA RNAi +		Luc RNAi	EGFR RNAi	EGFR RNAi²	EGFR RNAi³	Ras1 RNAi	Yki RNAi	CanA1 RNAi	CrebB RNAi	CrebB RNAi²	CRTC RNAi
5D 29C		146	0	0	0	1	0	152	241	114	143
		144	1	0	0	2	0	187	123	43	77
		166	15	0	0	0	0	126	102	94	49
		140	3	2	0	2	0	122	157	74	56
		196	1	0	0	0	0	169	56	160	157
		189	0	0	0	0	0	143	223	134	136
		82	0	0	0	3	0	167	298	69	42
		104	3	0	2	0	0	119	148	168	63
		182	0	1	0	0	0	135	124	188	114
						0		141	218
						0
	Ave	149.889	2.55556	0.333333	0.222222	0.727273	0	146.1	169	116	93
	SEM	12.8067	1.60823	0.235702	0.222222	0.332782	0	7.10782	23.3633	16.6408	14.8829
Figure 7--figure supplement 1G
EGT SERCA RNAi (BL25928)+		Ctrlᵛ	CanA1 RNAiᶠᵇ⁵	Yki RNAiᵛ
		275	272	4
		341	255	2
		186	376	1
		336	331	3
		252	149	0
		318	222	2
		252		9
		318		9
		284.75	267.5	3.75
		18.8952	32.7075	1.22109
